# Supplementary material for: Black phosphorus quantum dots as dual-functional electron-selective materials for efficient plastic perovskite solar cells
Source: Royal Society of Chemistry journal article supplement (doi:10.1039/c8ta01408f), 2018-01-01
Supplement: c8ta01408f1.pdf [file c8ta01408f1.pdf]

## Supplementary Information

### **Black Phosphorus Quantum Dots as Dual-Functional Electron Selective Materials for Efficient Plastic Perovskite Solar Cells**

*Nianqing Fu,<sup>a,\*</sup> Chun Huang,<sup>b</sup> Peng Lin,<sup>b</sup> Mingshan Zhu,<sup>c</sup> Tao Li,<sup>b</sup> Mao Ye,<sup>b</sup> Shenghuang Lin,<sup>d,\*</sup>*

*Guoge Zhang,<sup>a</sup> Jun Du,<sup>a</sup> Chang Liu,<sup>e</sup> Baomin Xu,<sup>e</sup> Danyang Wang,<sup>f</sup> and Shanming Ke,<sup>b,g,\*</sup>*

<sup>a</sup> School of Materials Science and Engineering, South China University of Technology, Guangzhou 510640, China.

<sup>b</sup>Guangdong Research Center for Interfacial Engineering of Functional Materials, College of Materials Science and Engineering, Shenzhen University, Shenzhen, 518060, China.

<sup>c</sup> School of Environment, Jinan University, Guangzhou 510632, P. R. China.

<sup>d</sup>Department of Applied Physics, The Hong Kong Polytechnic University, Hong Kong, China.

<sup>e</sup> Department of Materials Science and Engineering, South University of Science and Technology, Shenzhen 518055, China.

<sup>f</sup> School of Materials Science and Engineering, The University of New South Wales, Sydney, New South Wales 2052, Australia.

<sup>g</sup> School of Materials Science and Engineering, Nanchang University, Nanchang 330031, Jiangxi, China.

Corresponding authors:

Dr. N. Q. Fu, E-mail: [msnqfu@scut.edu.cn](mailto:msnqfu@scut.edu.cn)

Dr. S. Ke, E-mail: [smke@szu.edu.cn](mailto:smke@szu.edu.cn)

Dr. S. Lin, E-mail: [shenghuanglinchina@gmail.com](mailto:shenghuanglinchina@gmail.com)

**Table S1.** A survey of rigid and flexible PSCs employing low-temperature processed electron selective layer (ESL).

| ESL materials                          | Processing route                 | Processing temperature | Substrate | Device configuration <sup>a</sup> | Efficiency    | Published year | Ref. No. |
|----------------------------------------|----------------------------------|------------------------|-----------|-----------------------------------|---------------|----------------|----------|
| PCBM                                   | Solution-processed               | Room T                 | Flexible  | Inverted                          | <b>9.4</b>    | 2014           | S1       |
|                                        |                                  |                        |           |                                   | <b>18.1%</b>  | 2017           | S2       |
| Organic molecular CDIN                 | Solution-processed               | 100 °C                 | Flexible  | Normal                            | <b>14.2%</b>  | 2016           | S3       |
| Solid-State Ionic-Liquids              | Solution-processed               | 70 °C                  | Flexible  | Normal                            | <b>16.09%</b> | 2016           | S4       |
| Al <sub>2</sub> O <sub>3</sub>         | Solution-processed               | 150 °C                 | Rigid     | Normal                            | <b>12.3%</b>  | 2013           | S5       |
| TiO <sub>2</sub>                       | ALD+UV-irradiation               | Room T                 | Flexible  | Normal                            | <b>7.4%</b>   | 2015           | S6       |
|                                        | Solution-process photonic curing | 80 °C                  | Flexible  | Normal                            | <b>11.2%</b>  | 2016           | S7       |
|                                        | Magnetron sputtering             | Room T                 | Flexible  | Normal                            | <b>15.07%</b> | 2015           | S8       |
|                                        | Magnetron sputtering             | Room T                 | Flexible  | Normal                            | <b>15.8%</b>  | 2017           | S9       |
|                                        | Electron beam evaporated         | 100 °C                 | Flexible  | Normal                            | <b>13.5%</b>  | 2015           | S10      |
| Nb-doped TiO <sub>2</sub>              | UV-assisted solution process     | <50 °C                 | Flexible  | Normal                            | <b>16.01%</b> | 2016           | S11      |
| Hydrogen doping TiO <sub>2</sub> +PCBM | magnetron sputtering             | Room T                 | Rigid     | Normal                            | <b>19.3%</b>  | 2017           | S12      |
| ZnO                                    | Solution-processed               | 150 °C                 | Flexible  | Normal                            | <b>11%</b>    | 2015           | S13      |
|                                        | Solution-processed               | 150 °C                 | Flexible  | Normal                            | <b>15.6%</b>  | 2016           | S14      |

|                                  |                               |        |          |            |               |           |     |
|----------------------------------|-------------------------------|--------|----------|------------|---------------|-----------|-----|
|                                  | Solution-processed particles  | 150 °C | Rigid    | Mesoporous | <b>18.9%</b>  | 2017      | S15 |
| SnO <sub>2</sub>                 | ALD                           | 100 °C | Flexible | Normal     | <b>15%</b>    | 2016      | S16 |
|                                  | ALD+water vapor treatment     | 100 °C | Flexible | Normal     | <b>17.08%</b> | 2017      | S17 |
|                                  | Solution-processed            | 150 °C | Rigid    | Normal     | <b>19.9%</b>  | 2016      | S18 |
| Sb-doped SnO <sub>2</sub>        | Solution-processed            | 100 °C | Rigid    | Normal     | <b>17.7%</b>  | 2016      | S19 |
| Li-doped SnO <sub>2</sub>        | Solution-processed            | 185 °C | Flexible | Normal     | <b>14.78%</b> | 2016      | S20 |
| Zn <sub>2</sub> SnO <sub>4</sub> | Solution-processed            | 100 °C | Flexible | Normal     | <b>14.85%</b> | 2015      | S21 |
|                                  | Solution processed + particle | 100 °C | Flexible | Mesoporous | <b>16%</b>    | 2016      | S22 |
| WO <sub>x</sub>                  | Solution-processed            | Room T | Rigid    | Normal     | <b>14.9%</b>  | 2015      | S23 |
| In <sub>2</sub> O <sub>3</sub>   | Solution-processed            | 200 °C | Rigid    | Normal     | <b>14.39%</b> | 2017      | S24 |
| Nb <sub>2</sub> O <sub>5</sub>   | E-beam evaporated             | Room T | Flexible | Normal     | <b>15.56%</b> | 2017      | S25 |
| In <sub>2</sub> S <sub>3</sub>   | Chemical bath                 | 100 °C | Rigid    | Normal     | <b>18.22%</b> | 2017      | S26 |
| BPQDs                            | Solution-processed            | 60 °C  | Rigid    | Normal     | <b>14.6%</b>  | This work |     |
|                                  |                               |        | Flexible | Normal     | <b>11.26%</b> | This work |     |

<sup>a</sup> “Normal” represents that the PSCs were built in a planar structure

## Reference

S1 J. You, Z. Hong, Y. (Michael) Yang, Q. Chen, M. Cai, T.-B. Song, C.-C. Chen, S.g Lu, Y. Liu, H. Zhou and Y. Yang, *ACS Nano*, 2014, **8**, 1674-1680.

S2 C. Bi, B. Chen, H. Wei, S. DeLuca and J. Huang, *Adv. Mater.* 2017, **29**, 1605900.

S3 Z. Zhu, J.-Q. Xu, C.-C. Chueh, H. Liu, Z. Li, X. Li, H. Chen and A. K.-Y. Jen, *Adv. Mater.*, 2016, **28**, 10786-10793.

S4 D. Yang, R. Yang, X. Ren, X. Zhu, Z. Yang, C. Li and S. (Frank) Liu, *Adv. Mater.*,

2016, **28**, 5206-5213.

S5 J. M. Ball, M. M. Lee, A. Hey and H. J. Snaith, *Energy Environ. Sci.*, 2013, **6**, 1739-1743.

S6 F. Di Giacomo, V. Zardetto, A. D'Epifanio, S. Pescetelli, F. Matteocci, St. Razza, A. D. Carlo, S. Licoccia, W. M. M. Kessels, M. Creatore and T. M. Brown, *Adv. Energy Mater.*, 2015, **5**, 1401808.

S7 S. Das, G. Gu, P. C. Joshi, B. Yang, T. Aytug, C. M. Rouleau, D. B. Geohegan and K. Xiao, *J. Mater. Chem. A*, 2016, **4**, 9685-9690.

S8 D. Yang, R. Yang, J. Zhang, Z. Yang, S. (Frank) Liu and C. Li, *Energy Environ. Sci.*, 2015, **8**, 3208-3214.

S9 S. S. Mali, C. K. Hong, A. I. Inamdar, H. Imb and S. E. Shim, *Nanoscale*, 2017, **9**, 3095-3104.

S10 W. Qiu, U. W. Paetzold, R. Gehlhaar, V. Smirnov, H.-G. Boyen, J. G. Tait, B. Conings, W. Zhang, C. B. Nielsen, I. McCulloch, L. Froyen, P. Heremans and D. Cheynsa, *J. Mater. Chem. A*, 2015, **3**, 22824-22829.

S11 I. Jeong, H. Jung, M. Parkb, J. S. Park, H. J. Son, J. Joo, J. Lee, M. J. Ko, *Nano Energy*, 2016, **28**, 380-389.

S12 X. Yao, J. Liang, Y. Li, J. Luo, B. Shi, C. Wei, D. Zhang, B. Li, Y. Ding, Y. Zhao and X. Zhang, *Adv. Sci.*, 2017, **4**, 1700008.

S13 J. Zhang, E. José Juárez-Pérez, I. Mora-Seró, B. Viana and T. Pauporté, *J. Mater. Chem. A*, 2015, **3**, 4909-915.

S14 J. H. Heo, M. H. Lee, H. J. Han, B. R. Patil, J. S. Yub and S. H. Im, *J. Mater. Chem. A*, 2016, **4**, 1572-1578.

S15 J. Song, L. Liu, X.-F. Wang, G. Chen, W. Tian and T. Miyasakac, *J. Mater. Chem. A*, 2017, **5**, 13439-13447.

S16 C. Wang, D. Zhao, C. R. Grice, W. Liao, Y. Yu, A. Cimaroli, N. Shrestha, P. J. Roland, J. Chen, Z. Yu, P. Liu, N. Cheng, R. J. Ellingson, X. Zhao and Y. Yan, *J. Mater. Chem. A*, 2016, **4**, 12080-12087.

S17 C. Wang, L. Guan, D. Zhao, Y. Yu, C. R. Grice, Z. Song, R. A. Awni, J. Chen, J. Wang, X. Zhao, and Y. Yan, *ACS Energy Lett.*, 2017, **2**, 2118-2124.

- S18 Q. Jiang, L. Zhang, H. Wang, X. Yang, J. Meng, H. Liu, Z. Yin, J. Wu, X. Zhang and J. You, *Nat. Energy*, 2016, **14**, 16177.
- S19 Y. Bai, Y. Fang, Y. Deng, Q. Wang, J. Zhao, X. Zheng, Y. Zhang and J. Huang, *ChemSusChem*, 2016, **9**, 2686-2691.
- S20 M. Park, J.-Y. Kim, H. J. Son, C.-H. Lee, S. Soon Jang, M. J. Ko, *Nano Energy*, 2016, **26**, 208-215.
- S21 S. S. Shin, W. S. Yang, J. H. Noh, J. H. Suk, N. J. Jeon, J. H. Park, J. S. Kim, W. M. Seong and S. Il Seok, *Nat. Commun.*, 2015, **6**, 7410.
- S22 S. S. Shin, W. S. Yang, E. J. Yeom, S. J. Lee, N. J. Jeon, Y.-C. Joo, I. J. Park, J. H. Noh, and S. Il Seok, *J. Phys. Chem. Lett.*, 2016, **7**, 1845-1851.
- S23 Y. Hou, C. O. R. Quiroz, S. Scheiner, W. Chen, T. Stubhan, A. Hirsch, M. Halik, and C. J. Brabec, *Adv. Energy Mater.*, 2015, **5**, 1501056.
- S24 P. Chen, X. Yin, M. Que, X. Liu and W. Que, *J. Mater. Chem. A*, 2017, **5**, 9641-9648.
- S25 J. Feng, Z. Yanga, D. Yang, X. Ren, X. Zhu, Z. Jin, W. Zi, Q. Wei, S. (Frank) Liu, *Nano Energy*, 2017, **36**, 1-8.
- S26 Y. Hou, X. Chen, S. Yang, Y. L. Zhong, C. Li, H. Zhao, H. G. Yang, *Nano Energy*, 2017, **36**, 102-109.

### The generation of Tauc Plot and extraction of Eg value:

The bandgap of a semiconductor can be expressed as  $\alpha h\nu = C(h\nu - E_g)^n$  or

$$\left(\frac{Ah\nu}{K}\right)^{1/n} = h\nu - E_g$$

Where  $\alpha$  is the absorption coefficient ( $\text{m}^{-1}$ ),  $\nu$  is frequency of the light ( $\text{s}^{-1}$ ),  $h$  is the Plank's constant ( $6.626 \times 10^{-34}$  J s),  $E_g$  is the bandgap energy (eV),  $A$  is the absorbance of the UV-Vis spectrum,  $C$  and  $K$  are proportionality constants,  $n$  is an exponent which has values of 1/2, 3/2, 2, and 3 for direct allowed, direct forbidden, indirect allowed, and indirect forbidden transitions.

Therefore, the correlation,  $(\alpha h\nu)^{1/n}$  vs.  $h\nu - E_g$ , can be able to get the bandgap energy ( $E_g$ ) by plotting  $(\alpha h\nu)^{1/n}$  and  $h\nu - E_g$  as  $y$  and  $x$  axis, respectively. The proportionality constants  $C$  and  $K$  determine only the  $y$  value rather than the linear fit region. Since the BP is a direct bandgap semiconductor, the  $n$  value is 2 here. Once the linear fit is obtained, the  $E_g$  of the BPQDs can be then determined from the intercept of the linear fit in the lower energy absorption region of the plot of  $(\alpha h\nu)^{1/n}$  vs.  $h\nu - E_g$ .

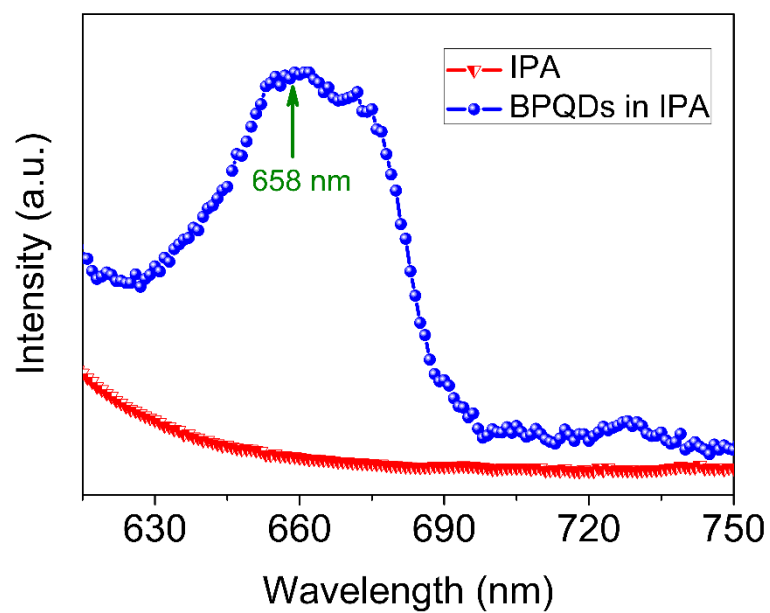

**Fig. S1** Steady-state photoluminescence (PL) spectrometry of isoproponal (IPA) and BPQDs in IPA. Excitation wavelength of the laser source is 550 nm.

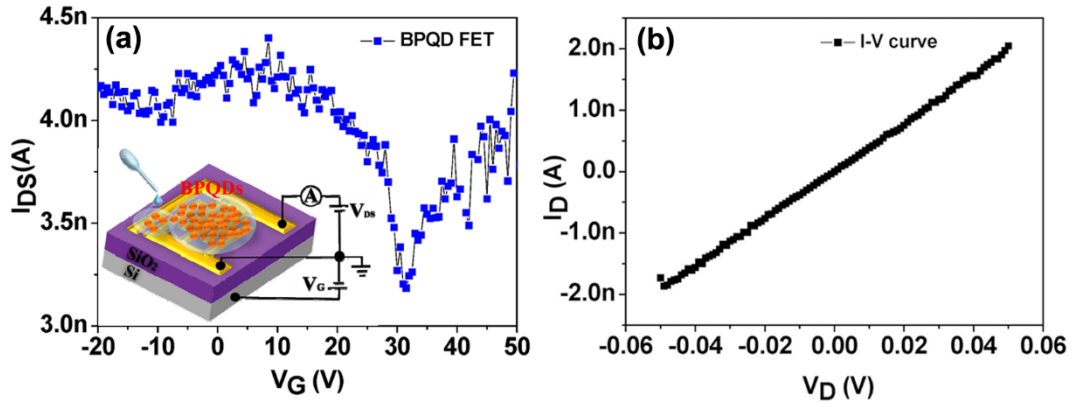

**Fig. S2.** (a) A typical room-temperature I-V curve of the BPQDs based FET. The inset reveals the device structure of BPQDs FET. (b) ID-VD curve of the FET.

### Experimental details:

The transfer characteristics of the FET are measured at room temperature using the configuration presented as insert in Fig. S1a. For this measurement, metal contacts (gold) were first deposited on SiO<sub>2</sub>/Si substrate by standard photolithography process to form bare gold contacts devices through a stencil mask aligned with the substrate. After that, a drop of BPQD solution was drop-casted on the bare devices with only gold interdigitated. The channel length and width of the device is 5 μm and 20 μm respectively. The source-drain V<sub>DS</sub> was set at 0.1 V while the backgate voltage V<sub>G</sub> was varied from -20 V to 50 V.



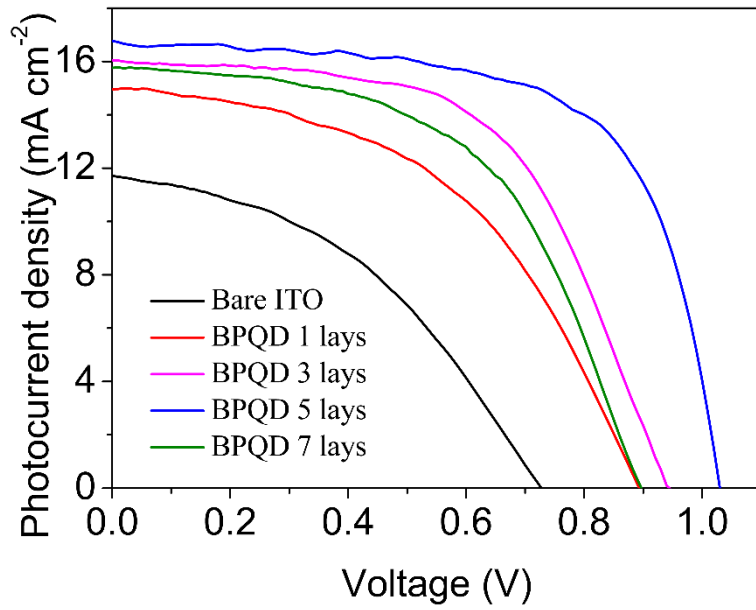

**Fig. S3.**  $J$ - $V$  characteristic curves of PSCs built on BPQDs electron selective layer (ESL) with various BPQDs thickness (i.e. 0, 1, 3, 5, 7 layers).

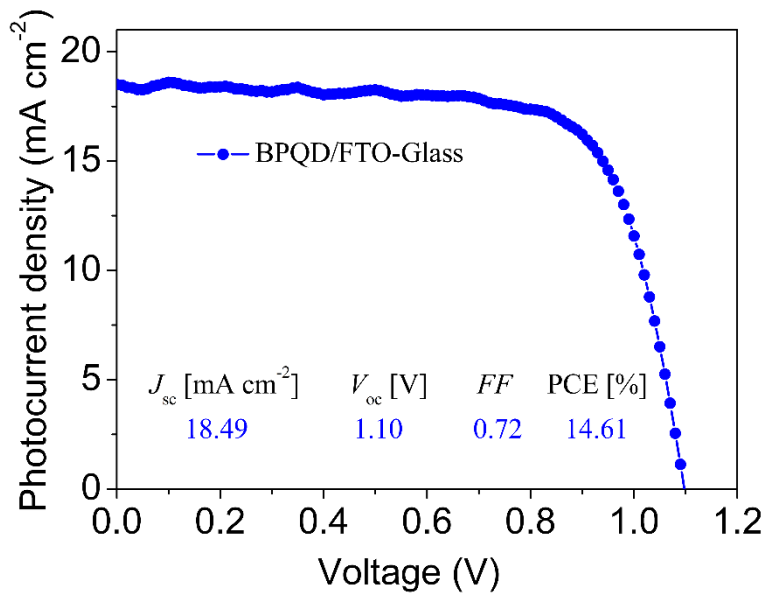

**Fig. S4.** The  $J$ - $V$  characteristic curves of rigid FTO/glass substrate based PSCs with a low-temperature produced BPQDs electron selective layer.

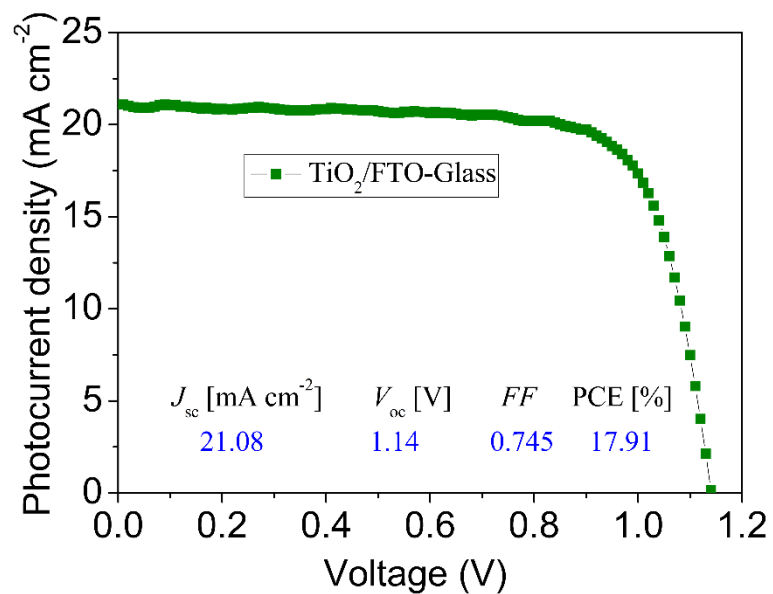

**Fig. S5.** The  $J$ - $V$  characteristic curves of rigid FTO/glass substrate based PSCs with a high-temperature produced ( $450\text{ }^{\circ}\text{C}$ ) compact  $\text{TiO}_2$  electron selective layer.

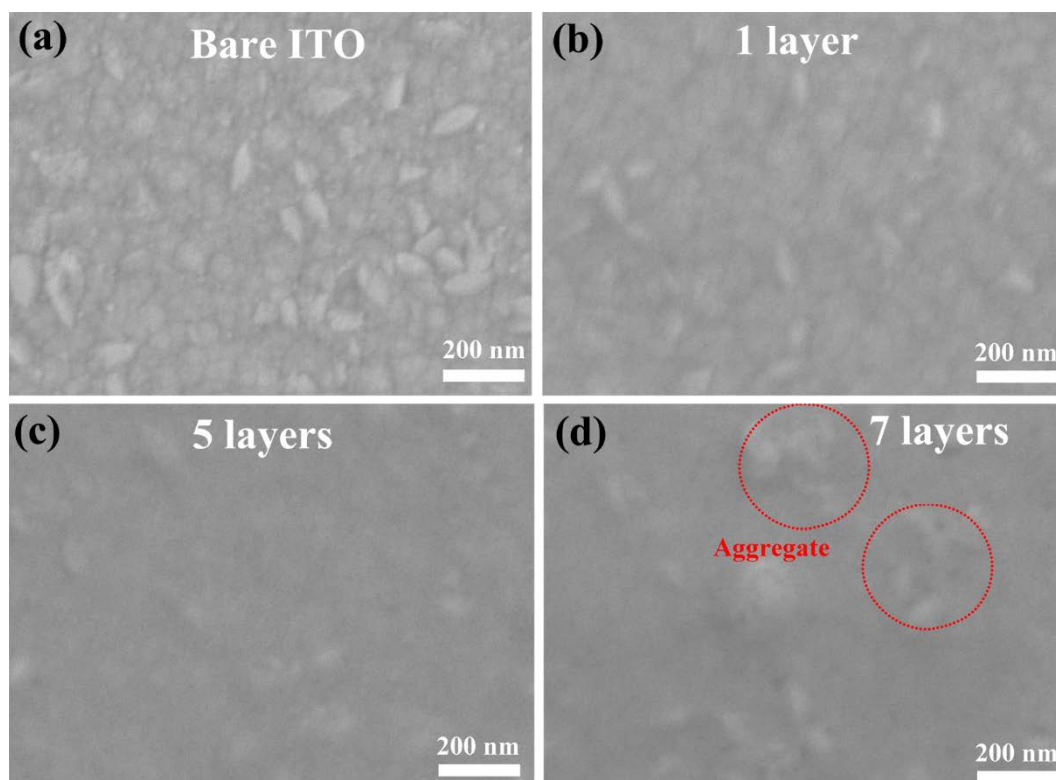

**Fig. S6.** SEM images of the electrodes with various layers (i.e. 0, 1, 5, 7) of BPQDs deposited on ITO surface.

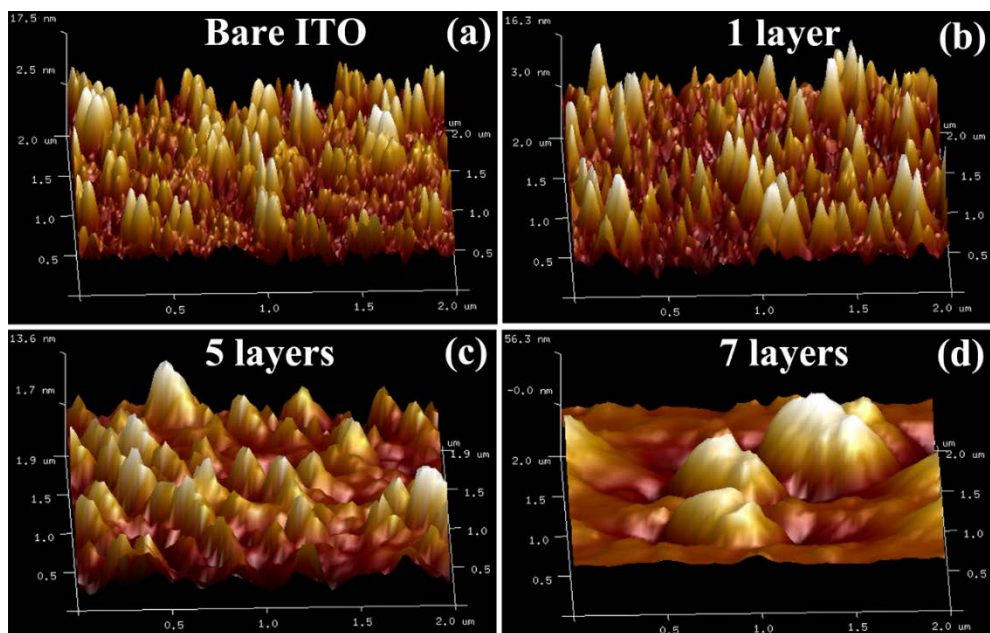

**Fig. S7.** 3D AFM images of the electrodes with various layers (i.e. 0, 1, 5, 7) of BPQDs deposited on ITO surface.

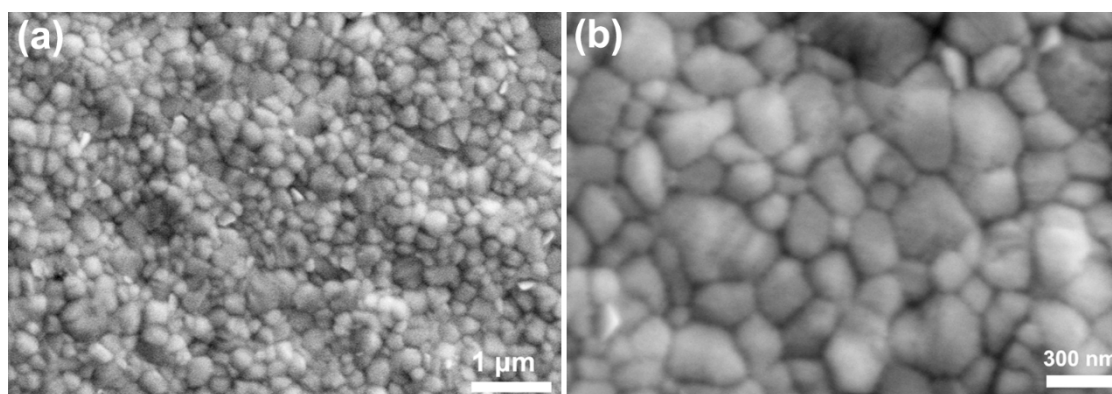

**Fig. S8** SEM images of mixed perovskite deposited on low-temperature produced  $\text{TiO}_2$  electron selective layer (ESL). The  $\text{TiO}_2$  ESL is prepared according to the reported work, Science 2014, 345, 542–546

**Table S2.** Time resolved photoluminescence characterization of the perovskite electrode built on bare ITO/PEN substrate and BPQDs coated ITO/PEN substrate.<sup>a</sup>

| Electrodes          | Component 1   |       |       | Component 2   |       |       | $\tau_{ave}$ (ns) |
|---------------------|---------------|-------|-------|---------------|-------|-------|-------------------|
|                     | $\tau_1$ (ns) | $A_1$ | $c_1$ | $\tau_2$ (ns) | $A_2$ | $c_2$ |                   |
| Bare ITO/Perovskite | 6.8           | 958   | 71.1% | 198.2         | 389   | 28.9% | 184.6             |
| BPQDs/Perovskite    | 4.3           | 1334  | 80.3% | 27.6          | 327   | 19.7% | 18.3              |

<sup>a</sup>The data were obtained by fitting the TRPL spectra with a bi-exponential decay function of the following form:

$$R(t) = R_0 + A_1 \exp\left(-\frac{t}{\tau_1}\right) + A_2 \exp\left(-\frac{t}{\tau_2}\right)$$

The average lifetime ( $\tau_{ave}$ ) and weight concentration ( $c$ ) are calculated according to Equation 1 and Equation 2, respectively.

$$\tau_{ave} = \sum_{i=1}^n \frac{A_i \tau_i^2}{A_i \tau_i} = \frac{A_1 \tau_1^2 + A_2 \tau_2^2}{A_1 \tau_1 + A_2 \tau_2} \quad (\text{Equation 1})$$

$$c_i = \frac{A_i}{\sum_{i=1}^n A_i} \quad (\text{Equation 2})$$

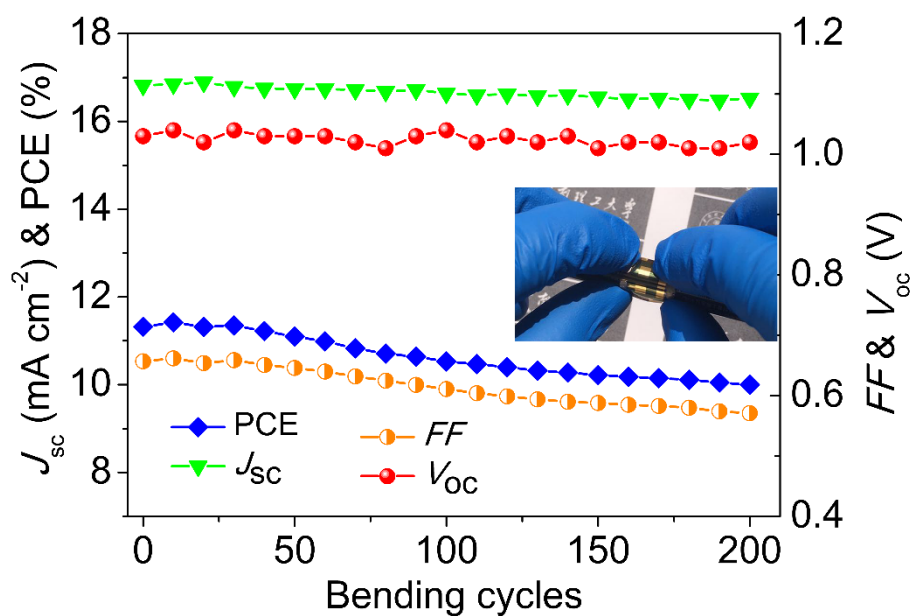

**Fig. S9** The photovoltaic parameters variations of the BPQDs-based plastic PSCs as a function of bending cycles.

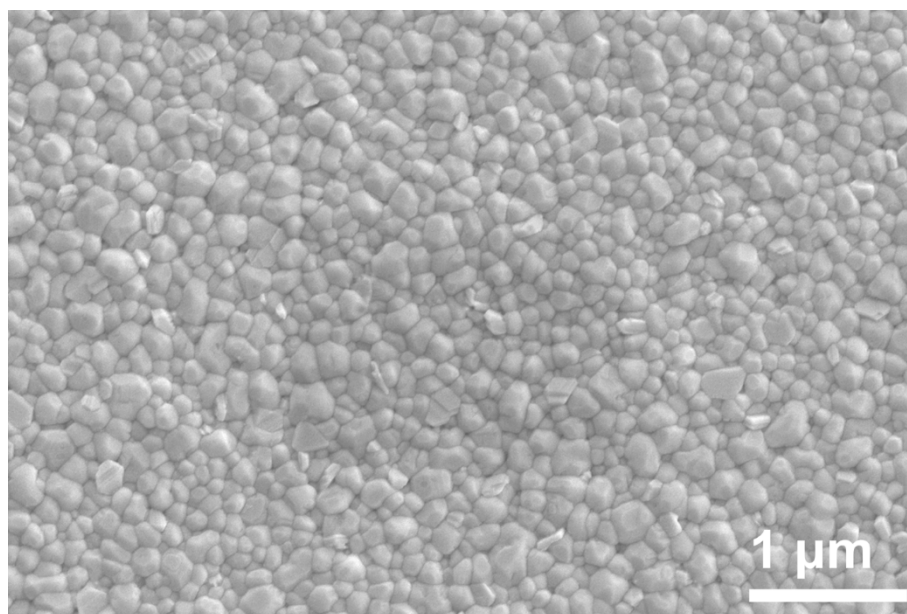

**Fig. S10** The SEM images of the perovskite film deposited on BPQDs ESL, after 200 cycles of bending
